# Supplementary material
Source: bioRxiv or medRxiv preprint supplement (https://www.biorxiv.org/highwire/filestream/138445/field_highwire_adjunct_files/0/460279-1.pdf)
Supplement: Supplementary file [file 460279-1.pdf]

**Fibroblast activation protein enzyme deficiency prevents liver steatosis, insulin resistance and glucose intolerance and increases fibroblast growth factor-21 in diet induced obese mice**

Sumaiya Chowdhury, Sunmi Song, Hui Emma Zhang, Xin Maggie Wang, Margaret G. Gall, Denise Ming Tse Yu, Angelina J. Lay, Michelle Sui Wen Xiang, Kathryn A. Evans, Stefanie Wetzel, Yolanda Liu, Belinda Yau, Andrew L. Coppage, Lisa Lo, Rebecca A. Stokes, Wayne J. Hawthorne, Gregory J. Cooney, Susan V. McLennan, Jenny E. Gunton, William W. Bachovchin, Nigel Turner, Melkam A. Kebede, Geoffrey W. McCaughan, Stephen M. Twigg, Mark D. Gorrell

**Supplementary Material:**

**Supplementary Method:**

**Generation of the FAP gene knock-in (gki) mouse strain**

*Fap* conditional and constitutive knock-in mice containing the point mutation Ser624Ala, which ablates catalytic activity, [1] were generated by Ozgene (Bentley, Western Australia) using standard techniques. A “floxed” “mini cDNA cassette, cloned into intron 21 approximately 100 bp upstream of exon 22 (E22) (Fig. S1), consisted of a fused exon (E22-E26) derived from wildtype *Fap* cDNA (OriGene, Rockville, MD; #BC019190) followed by a polyadenylation signal (pA) to terminate transcription and thus force expression of wildtype *Fap*; and further followed by a *PGK-neomycin* selection cassette flanked by *FRT* sites. The TCC to GCC point mutation (Ser624Ala) was targeted into the first codon of endogenous E22 downstream of the mini cDNA cassette and the selection cassette.

*Fap*<sup>wt/flox</sup> neomycin-resistant C57BL/6 Bruce4 embryonic stem (ES) cell clones were identified by Southern blot analyses (Fig. S2) and microinjected into BALB/c blastocysts for generation of *Fap*<sup>wt/flox</sup> mice. *Fap*<sup>wt/conKI</sup> mice, which express the wildtype *Fap* mini cDNA cassette, were generated by *flp*-mediated excision of the *PGK-neomycin* selection cassette. *Fap*<sup>wt/KI</sup> (heterozygote FAPgki) mice were generated by *cre*-mediated excision of the wildtype *Fap* mini cDNA cassette. All ES clones and mice were screened and verified by Southern Blot analyses (Fig. S2). Putative FAPgki mice were also screened by specific FAP enzyme assay of plasma [2] (Fig. S3A). We previously showed that human FAPSer624Ala is cell surface expressed and bound by the F19 MAb, which depends upon

correct protein conformation [1, 3]. As evidence for correct protein folding of FAP in mice that carry this mutation, we showed that cell surface expression of FAP was not diminished by Ser624Ala point mutation in the FAPgki mice (Fig. S3B).

-----

#### **Supplementary Method:**

##### **Cell surface expression of FAP on fibroblasts**

Lung was harvested from FAPgki mouse and cut into ~1 mm pieces that were digested with 0.5 mg/ml collagenase at 37°C for 30 min, then pushed through a 70 µm cell strainer. After centrifugation at 1200 rpm for 5 min, cells were resuspended in complete media (DMEM with 10% FCS, antibiotic and Amphotericin B) and cultured. For flow cytometry, confluent fibroblasts were harvested as cell suspensions using trypleE (Cat. no. 12605, Thermo Scientific, Carlsbad, CA, USA). Briefly, cells were fixed in 2% (v/v) paraformaldehyde (Cat. no. 18814, Polysciences, Warrington, PA, USA) and stained with primary antibody against FAP (Cat. no. BAF3715, R&D Systems, Minneapolis, MN, USA) or normal sheep IgG (Cat. no. 31243, Thermo Fisher Scientific) as a negative control. Cells were analyzed on Cano II (BD Biosciences). Flow cytometric data were analyzed with FlowJo software version 9.9 (TreeStar, Ashland, Ore).

-----

#### **Supplementary Method:**

##### **Plasma GLP-1**

For GLP-1 assay, blood samples were collected from fasting mice and mice after 15 min post glucose challenge. Glucose (2 g/kg body weight) was administered by oral gavage following 6 h fasting. Blood samples were collected on ice in 1 mL EDTA tubes (Mini Collect®, Kremsmunster, Austria). Prior to blood collection, DPP4 inhibitor, Sitagliptin (Merck, NJ, USA) was added to the tubes for a final concentration of 10 µM, to prevent ex vivo degradation of GLP-1 in the blood. Blood was centrifuged at 3000 g for 5 min and supernatant (plasma) was stored at -80°C. All steps were performed at 4°C. Active GLP-1 was measured using GLP-1 ELISA kit (Cat. No. #81508) (Crystal Chem, IL, USA) according to manufacturers instructions.

-----

#### **Supplementary Method:**

##### **Diets:**

Mice were given ad libitum access to water and either chow diet (8% kcal fat, 21% kcal protein, 71% kcal carbohydrate; Gordon's Specialty Stock Feeds, Yanderra, NSW, Australia or Specialty Feeds, WA, Australia) (control group) or to High Fat Diet (HFD).



Each HFD cage had non-edible alpha-dri bedding and, for dental health, a wooden chew block (cat no. ASAEC-A, Able Scientific, WA, Australia). HFD was purchased (Specialty Feeds; Cat. No. SF03-020) or made in-house. The Specialty Feeds HFD was hydrogenated vegetable oil (Copha) based and contained 43% kcal fat, 17% kcal protein, 40% kcal carbohydrate (with 0.19% weight/volume cholesterol) as it is designed to be atherogenic and diabetogenic (Specialty Feeds catalogue, 2009). The in-house HFD was based on rodent diet D12451 of Research Diets (New Brunswick, NJ, USA) [4, 5]. The detail of this lard based in-house HFD, which contains 45% kcal fat, 20% kcal protein, 35% kcal carbohydrate, is published [4]. Weight gain by WT mice was similar between chow and  $\gamma$ -irradiated HFD, so when  $\gamma$ -irradiation of commercially supplied HFD became mandatory in our animal facility, only in-house HFD was used.

-----

### **Supplementary Method:**

#### **Immunohistochemistry and immunofluorescence stain**

Liver paraffin sections at 5  $\mu$ m were rehydrated and then antigen retrieved using proteinase K (20  $\mu$ g/ml) for 20 min. F4/80 antibody supernatant (Gift from Dr S Tikoo) at 10  $\mu$ g/ml was incubated for 1.5 hour at room temperature, with rat IgG as a control. After repeated washes in PBS, sections were incubated for 30 min with horseradish peroxidase (HRP)-conjugated secondary antibody (Dako, Glostrup, Denmark). The chromogenic reaction employed 3,3-diaminobenzidine (DAB) with H<sub>2</sub>O<sub>2</sub>. Liver frozen sections at 5  $\mu$ m were fixed with 4% PFA and blocked with BSA. Primary antibody to CD36 (AF2519, R&D) at 33 ng/ml was incubated for 1.5 h at room temperature followed by a AF488-labelled donkey anti-sheep antibody then DAPI to counterstain nuclei. Quantification of immunostains used an LAS image software package, version 4.8. Total F4/80 staining was expressed as percentage of F4/80 immunostain in the assessed liver area at 10x magnification. Fluorescence intensity of CD36 immunostaining from four fields per section at 200x magnification was quantified in arbitrary units of fluorescent signal at 488 nm absorbance.

**Table S1. The genes studied by Taqman gene expression assay.**

| Gene Name                                                                   | Gene ID               | Assay ID      |
|-----------------------------------------------------------------------------|-----------------------|---------------|
| Acetyl-Coenzyme A carboxylase alpha                                         | <i>Acc</i>            | Mm01304276_m1 |
| Apolipoprotein C3                                                           | <i>Apoc3</i>          | Mm00445670_m1 |
| Carnitine palmitoyltransferase 1                                            | <i>Cpt1</i>           | Mm00550438_m1 |
| CD36 Antigen                                                                | <i>Cd36</i>           | Mm01135198_m1 |
| Carbohydrate Response Element Binding Protein; MLX Interacting Protein Like | <i>Chrebp; Mlxipl</i> | Mm00498811_m1 |
| Dipeptidyl peptidase 4                                                      | <i>Dpp4</i>           | Mm00494548_m1 |
| Dipeptidyl peptidase 8                                                      | <i>Dpp8</i>           | Mm00547049_m1 |
| Dipeptidyl peptidase 9                                                      | <i>Dpp9</i>           | Mm00841122_m1 |
| Eukaryotic 18S rRNA                                                         | <i>18S</i>            | Hs99999901_s1 |
| Fatty acid synthase                                                         | <i>Fasn</i>           | Mm00662319_m1 |
| Fibroblast activation protein                                               | <i>Fap</i>            | Mm00484254_m1 |
| Fibroblast growth factor 21                                                 | <i>Fgf21</i>          | Mm00840165_g1 |
| Glucokinase                                                                 | <i>Gck</i>            | Mm00439129_m1 |
| Low density lipoprotein receptor                                            | <i>Ldlr</i>           | Mm01177349_m1 |
| Lipin1                                                                      | <i>Lipin-1</i>        | Mm00550511_m1 |
| Peroxisome proliferative activated receptor gamma                           | <i>Ppar-γ</i>         | Mm01184322_m1 |
| Peroxisome proliferator activated receptors α                               | <i>Ppara</i>          | Mm00627559_m1 |
| Sterol regulatory element binding protein-1c                                | <i>Srebp1-c</i>       | Mm00550338_m1 |
| Eukaryotic 18S rRNA*                                                        | <i>18S</i>            | Hs99999901_s1 |
| Beta-actin*                                                                 | <i>Actb</i>           | Mm00607939_s1 |

- Housekeeping gene.

-----

**Table S2. All data of human pancreas samples obtained from nPOD.**

| <b>FAP Activity</b><br>( $\Delta$ pmol AMC/min/mg Protein) | <b>Donor Type</b> | <b>AutoAb (RIA)</b> | <b>Age (years)</b> | <b>Diabetes Duration (years)</b> | <b>Gender</b> | <b>Ethnicity</b> | <b>C-peptide (ng/ml)</b> | <b>HbA1c</b> | <b>BMI</b> | <b>Clinical History</b>                         | <b>Cause of Death</b> | <b>Histopathology</b>                                                          | <b>Comment</b>                                                    |
|------------------------------------------------------------|-------------------|---------------------|--------------------|----------------------------------|---------------|------------------|--------------------------|--------------|------------|-------------------------------------------------|-----------------------|--------------------------------------------------------------------------------|-------------------------------------------------------------------|
| 3.943                                                      | No diabetes       | Negative            | 59                 |                                  | Female        | Caucasian        | 9.89                     |              | 24.8       |                                                 |                       | Ins+/Gluc+ normal islets. Fatty infiltration-mild                              |                                                                   |
| 5.664                                                      | No diabetes       | Negative            | 30                 |                                  | Male          | Caucasian        | 17.91                    |              | 20.6       |                                                 |                       | Ins+/Gluc+ normal islets. Insulin+ less intense and distinct as for most ot... |                                                                   |
| 22.957                                                     | No diabetes       | Negative            | 27                 |                                  | Male          | Hispanic         | 9.09                     |              | 19.1       |                                                 |                       | Normal. Very mild, acute pancreatitis.                                         | Very faint glucagon. Repeating stains.                            |
| 4.044                                                      | No diabetes       | Negative            | 27.1               |                                  | Male          | Caucasian        | 7.71                     | 6.3          | 35.6       |                                                 |                       | Ins+/Gluc+ normal islets, many large especially in head and body. Degree of... | Multifocal, mild ductular mucinous metaplasia.                    |
| 5.432                                                      | No diabetes       | Negative            | 45.1               |                                  | Female        | Caucasian        | 0.55                     | 6.1          | 35.1       | Hypertension<br>Father had diabetes and stroke. |                       | Ins+/Gluc+ islets. Multifocal, mild periductal and peri-islet fibrosis. Mil... | Focal islet hyperplasia.                                          |
| 4.239                                                      | No diabetes       | Negative            | 41                 |                                  | Male          | Caucasian        | 20.55                    |              | 20.5       |                                                 |                       | Ins+/Gluc+ islets. Mild adipose infiltration exocrine regions.                 | Scaring one section. 1 foci mononuclear infiltrate peri-vascular. |

Chowdhury et al. Supplementary Material

|       |             |          |      |  |        |           |      |     |      |                     |                        |                                                                                |                                                                                                                                                                                                           |
|-------|-------------|----------|------|--|--------|-----------|------|-----|------|---------------------|------------------------|--------------------------------------------------------------------------------|-----------------------------------------------------------------------------------------------------------------------------------------------------------------------------------------------------------|
| 6.524 | No diabetes | Negative | 24.2 |  | Male   | Caucasian | 1.01 |     | 24.8 | IA2A+ by screening. |                        | Ins+/Gluc+ islets. Occ. high islet Ki67.                                       |                                                                                                                                                                                                           |
| 7.028 | No diabetes | Negative | 45.8 |  | Female | Caucasian | 4.45 | 5.6 | 25   |                     |                        | Ins+/Gluc+ numerous islets, normal sizes. No infiltrates. Mild acinar fat. ... | Multifocal ductular dysplasia with epithelial proliferation. Extra-acinar islets have back ground staining of insulin into surrounding connective tissues. Minor background of DAB chromogen for CD3 too. |
| 9.972 | No diabetes | Negative | 31   |  | Female | Caucasian | 6.23 | 5.5 | 26.9 |                     | Head Trauma (MVA)      | Ins+/Gluc+ islets, no abnormalities observed. Occasional islet hyperemia.      |                                                                                                                                                                                                           |
| 4.984 | No diabetes | Negative | 20   |  | Female | Caucasian | 6.89 | 5.8 | 25.6 |                     | Head trauma (MVA)      | Ins+/Gluc+ islets. No abnormalities observed. Low Ki67 all compartments.       |                                                                                                                                                                                                           |
| 4.153 | No diabetes | Negative | 31   |  | Male   | Caucasian | 8.1  |     | 25.4 |                     | Head Trauma (Gun shot) | Ins+/Gluc+ islets, numerous. Occ. islet has high numbers Ki67 cells. Islet ... | Very clean pancreas, PanTail has 1 lobule with high fatty infiltration.                                                                                                                                   |

Chowdhury et al. Supplementary Material

|        |     |                                    |      |    |        |           |       |  |      |                                                                                |  |                                                                                  |                                                                                                                                            |
|--------|-----|------------------------------------|------|----|--------|-----------|-------|--|------|--------------------------------------------------------------------------------|--|----------------------------------------------------------------------------------|--------------------------------------------------------------------------------------------------------------------------------------------|
| 5.286  | T1D | Negative                           | 22.4 | 14 | Male   | Caucasian | <0.05 |  | 24.1 | Maternal uncle and paternal grandfather had T1D. Retinopathy and neuropathy... |  | Ins-/Gluc+ islets. Mild to moderate atrophy.                                     | Islets reasonable number and sizes.                                                                                                        |
| 19.345 | T1D | Negative                           | 31.4 | 15 | Male   | Hispanic  | 0.24  |  | 28   |                                                                                |  | Ins+ islets. Mild to moderate chronic pancreatitis. Moderate interlobular a...   | Ki67+ vascular smooth muscle. Mild ductular metaplasia.                                                                                    |
| 7.813  | T1D | GADA+<br>IA-2A+<br>ZnT8A+<br>mIAA+ | 31.2 | 5  | Male   | Caucasian | <0.05 |  | 27   |                                                                                |  | Ins+/Gluc+ islets (much decreased). Insulinitis. Chronic pancreatitis- mild, ... | Possible insulinitis. Mild to moderate CVD. Fatty infiltrate mild. Very mild, focal autolysis few blocks. Peri-ductular fibrosis moderate. |
| 9.615  | T1D | GADA+<br>mIAA+                     | 43.5 | 21 | Male   | Caucasian | <0.05 |  | 28.7 | GADA+ by autoab. screening. Endstage renal failure (dialysis 1 year), HTN, ... |  | Ins- islets including extra-acinar. Moderate to severe exocrine atrophy. Mo...   |                                                                                                                                            |
| 8.954  | T1D | mIAA+                              | 49.2 | 41 | Female | Caucasian | <0.05 |  | 33.7 | Coronary artery disease and hypertension.                                      |  | Ins-/Gluc+, atrophy, decreased numbers. High acinar and duct Ki67. CD3+ inf...   | At recovery noted: areas of fatty pancreas with evidence of chronic                                                                        |

|        |     |                |      |    |        |                  |       |     |      |                                                                                |  |                                                                                |                                                                                                                                                       |
|--------|-----|----------------|------|----|--------|------------------|-------|-----|------|--------------------------------------------------------------------------------|--|--------------------------------------------------------------------------------|-------------------------------------------------------------------------------------------------------------------------------------------------------|
|        |     |                |      |    |        |                  |       |     |      |                                                                                |  |                                                                                | inflammation and pancreatitis. Admission glucose >600 and hypokalemia. PA also noted gross enlargement with areas of saponification and pancreatitis. |
| 37.748 | T1D | Negative       | 44.1 | 15 | Male   | Caucasian        | <0.05 |     | 23.9 |                                                                                |  | Ins-/Gluc+ islets, reduced density. Acinar atrophy moderate to severe with ... |                                                                                                                                                       |
| 33.881 | T1D | GADA+<br>mIAA+ | 26   | 15 | Female | African American | 0.48  |     | 26.6 |                                                                                |  | Ins+ (reduced numbers but in all regions)/Gluc+ islets, normal sizes, reduc... | Possible amyloid.                                                                                                                                     |
| 51.234 | T1D | GADA+<br>mIAA+ | 28   | 21 | Male   | Caucasian        | <0.05 | 7.2 |      | Mother had gestational diabetes while pregnant with donor. Hypertension (mi... |  | Ins-/Gluc+ islets. High duct and exocrine Ki67. Small duct plugging with ru... | Some black precipitate may interfere with image analysis. Acute and chronic pancreatitis.                                                             |
| 75.039 | T1D | Negative       | 32   | 16 | Female | Caucasian        | <0.05 |     | 23.4 |                                                                                |  | Ins-/Gluc+ islets present in reduced numbers. No significant inflammation b... |                                                                                                                                                       |

Chowdhury et al. Supplementary Material

|        |     |                 |    |    |        |                  |       |     |      |                          |                        |                                                                                |                                                                                                                                                             |
|--------|-----|-----------------|----|----|--------|------------------|-------|-----|------|--------------------------|------------------------|--------------------------------------------------------------------------------|-------------------------------------------------------------------------------------------------------------------------------------------------------------|
| 6.925  | T1D | GADA+<br>mIAA+  | 35 | 11 | Female | Caucasian        | <0.05 |     | 27.4 |                          | Anoxia                 | Ins-/Gluc+ islets in much reduced numbers. Moderate widespread exocrine atr... |                                                                                                                                                             |
| 11.819 | T1D | mIAA+           | 61 | 52 | Male   | Caucasian        | <0.05 |     | 21.6 |                          | Cerebrovascular/Stroke | Ins-/Gluc+ islets (pseudoatrophic). Exocrine atrophy moderate with focal mi... | Reviewed with Chen Liu-PanIN1 designation. Stretch to call PanIN2.                                                                                          |
| 49.447 | T1D | Negative        | 58 | 22 | Female | Caucasian        | 1.28  | 6.1 | 28.6 |                          | Not avail              | Ins+/Gluc+ islets (much reduced numbers). Severe chronic pancreatitis. Mode... | Chen Liu reviewed 8/16/13 mct. Also reviewed 3/24/14 1. Tremendous atrophy. 2. Lots of islets. 3. Insulin+ islets-lots. 4. PanIN2-PT 04, focal. T2D likely. |
| 9.848  | T1D | IA-2A+<br>mIAA+ | 39 | 19 | Male   | Caucasian        | <0.05 |     | 19.5 | Fell (non-MVA accident). | Head Trauma            | Ins-/Gluc+ islets. Acute pancreatitis-moderate to focally severe. Duct plu...  | Chen Liu reviewed 8/16/13 mct.                                                                                                                              |
| 16.588 | T1D | IA-2A+          | 41 | 27 | Female | African American | <0.05 |     | 21.1 |                          | Cerebrovascular/Stroke | Ins-/Gluc+ islets in reduced numbers. Extra-acinar islets in fibrotic regio... | A*36:01 , 74:01                                                                                                                                             |



Chowdhury et al. Supplementary Material

|        |     |          |      |      |        |                  |       |   |      |                                                                                |  |                                                                                |                                                                                                                                                                                                                                                                                                                           |
|--------|-----|----------|------|------|--------|------------------|-------|---|------|--------------------------------------------------------------------------------|--|--------------------------------------------------------------------------------|---------------------------------------------------------------------------------------------------------------------------------------------------------------------------------------------------------------------------------------------------------------------------------------------------------------------------|
| 16.744 | T2D | Negative | 18.8 | 0.25 | Female | Hispanic         | 10.68 |   | 39.1 | DKA 3 months prior with acute renal failure. 3 months duration diabetes. Ca... |  | Ins+ islets, clusters, single cells plentiful. CD3+ foci intra-acinar and p... | Islets are insulin + with normal Ki67 (ie, rare). Ducts have normal numbers of beta cells (present yet exceedingly low proportion). Only occ. focal ductular proliferation or mucinous metaplasia. Glucagon + islet cells very heterogeneous distribution between lobules and faint. Fatty infiltrate mild-note high BMI. |
| 9.384  | T2D | mIAA+    | 48.8 | 0    | Female | Hispanic         | <0.05 | 8 | 32.5 | Preclinical. Plasma (no serum) available.                                      |  | Ins+/Gluc+ islets though in reduced density, especially in head. Amyloid. L... | Mild autolysis PanHead 02. Islets in head region arranged more in loops compared to body and tail regions.                                                                                                                                                                                                                |
| 12.470 | T2D | Negative | 20.7 | 0    | Female | African American | 0.58  |   | 40   | Acute onset. Gestational diabetes in past. Father                              |  | Ins+ (reduced)/Gluc+ islets various sizes, some                                | Some lobules have increased fibrosis between acinar cells.                                                                                                                                                                                                                                                                |

Chowdhury et al. Supplementary Material

|        |     |          |      |    |        |           |      |     |      |                                                                                   |  |                                                                                   |                                                                                                                          |
|--------|-----|----------|------|----|--------|-----------|------|-----|------|-----------------------------------------------------------------------------------|--|-----------------------------------------------------------------------------------|--------------------------------------------------------------------------------------------------------------------------|
|        |     |          |      |    |        |           |      |     |      | had diabetes.                                                                     |  | atrophied. Low<br>Ki67. No fat...                                                 |                                                                                                                          |
| 16.204 | T2D | Negative | 42.8 | 2  | Male   | Caucasian | 0.58 | 7.8 | 31   | Diabetes medication was oral Metformin (1 g/day) for 2 years but noncompliance... |  | Ins+ (reduced)/Gluc+ islets with severe amyloidosis. Severe exocrine atroph...    | Megaislets/islet hypertrophy (8/26/13)                                                                                   |
| 7.236  | T2D | Negative | 62.3 | 3  | Male   | Caucasian | 2.85 |     | 33.7 | Metformin for 3 years.                                                            |  | Ins+/Gluc+, normal islet density. Hypertrophied islets. Amyloid. Acinar atroph... | Mild acinar autolysis with possible secondary changes connective tissues including islet vasculature. Islet hypertrophy. |
| 1.478  | T2D | mIAA+    | 44.8 | 10 | Female | Caucasian | 0.08 |     | 30.4 |                                                                                   |  | Ins+ (reduced)/Gluc+ islets. Mild adiposity exocrine regions. Low Ki67.           | Amyloid noted 5/30/13 mct.                                                                                               |
| 6.195  | T2D | Negative | 55.8 | 0  | Female | Hispanic  | 0.8  | 9.1 | 44.6 | Preclinical T2D ie no diagnosis or medication for diabetes; Hypertension for...   |  | Ins+ (reduced) islets, numerous, smaller. Low Ki67. Amyloid. Exocrine atroph...   |                                                                                                                          |

Chowdhury et al. Supplementary Material

|        |              |                    |      |    |        |           |                    |     |      |                                                                                |  |                                                                                |                                                                                           |
|--------|--------------|--------------------|------|----|--------|-----------|--------------------|-----|------|--------------------------------------------------------------------------------|--|--------------------------------------------------------------------------------|-------------------------------------------------------------------------------------------|
| 45.791 | T2D          | No serum available | 45.1 | 20 | Male   | Hispanic  | No serum available | 8   | 25.3 | No serum or cells available. Negative for GADA and IA2A by autoantibody scr... |  | Ins+ (weak)/Gluc+ islets, numerous but small sized. Mild acinar atrophy.       | HbA1c added mct 7/22/13                                                                   |
| 7.641  | T2D+Incretin | Negative           | 68.3 | 5  | Male   | Caucasian | 2.98               | 6.3 | 20.9 |                                                                                |  | Ins+/Gluc+ islets, plentiful; mild, multifocal amyloid. Mild, multifocal ch... | Low Ki67. HbA1c added mct 7/22/13                                                         |
| 24.893 | T2D          | Negative           | 36.1 | 0  | Male   | Hispanic  | 3.45               | 7.2 | 30.6 | Preclinical T2D based on HbA1c.                                                |  | Ins+/Gluc+ islets. Low Ki67. No infiltrates or amyloid observed.               |                                                                                           |
| 15.458 | T2D+Incretin | mIAA+              | 48.5 | 26 | Female | Caucasian | 1.85               |     | 36.1 |                                                                                |  | Ins+/Gluc+ numerous islets. Rare amyloid in islets. Very mild chronic pancr... | Focally severe exocrine atrophy.                                                          |
| 29.407 | T2D          | Negative           | 62   | 10 | Female | Caucasian | 6.14               | 6   | 19.9 | Metformin 1g / twice a day.                                                    |  | Ins+/Gluc+ plentiful islets, several with vascular congestion or amyloid. S... |                                                                                           |
| 11.393 | T2D+Incretin | Negative           | 47.4 | 13 | Male   | Caucasian | 0.16               | 7.3 |      | Renal transplant 7 years ago; retinopathy.                                     |  | Ins+/Gluc+ islets, numerous. Moderate acinar atrophy with fatty replacement... | IPMN PanHead 04 block (this statement added to histopath and specimen levels 1/14/14 mct) |

Chowdhury et al. Supplementary Material

|        |              |          |    |    |      |                  |      |  |      |                                      |  |                                                                                |  |
|--------|--------------|----------|----|----|------|------------------|------|--|------|--------------------------------------|--|--------------------------------------------------------------------------------|--|
| 24.064 | T2D+Incretin | Negative | 53 | 20 | Male | African American | 8.87 |  | 29.6 | Father and 3 siblings with diabetes. |  | Ins+/Gluc+ islets with moderate fibrosis and variable amyloidosis. Moderate... |  |
|--------|--------------|----------|----|----|------|------------------|------|--|------|--------------------------------------|--|--------------------------------------------------------------------------------|--|

## Supplementary Figure legends

**Fig. S1. Generation of conditional and constitutive *Fap* Ser624Ala knockin (FAPgki) mice.** Representation of the *Fap* wildtype genomic locus (A), the targeted locus *Fap<sup>fllox</sup>* (B), the FRT recombined locus *Fap<sup>conKI</sup>* (C) and the *Cre* deleted locus *Fap<sup>KI</sup>* (D). 5' probe, 3' probe, enP probe and relevant restriction sites are indicated, as well as the positions of the wildtype *Fap* mini cDNA cassette and *PGK-neomycin* selection cassette.

**Fig. S2. Southern blot verification of *Fap<sup>wt/conKI</sup>* and *Fap<sup>wt/KI</sup>* mice.** Southern blot screening tail DNA confirmed targeted recombination at each end of the *Fap* locus: 5' probe on *EcoRV* digest showing *Fap<sup>wt</sup>* and *Fap<sup>fllox</sup>* alleles (A), 3' probe on *KpnI* digest showing *Fap<sup>wt</sup>* and *Fap<sup>fllox</sup>* alleles (B). *Fap<sup>conKI</sup>* (C) and *Fap<sup>KI</sup>* alleles (D) were identified using the enP probe on *EcoRV* digest. The use of a neomycin probe confirmed a single integration event (data not shown). As expected, intrahepatic *Fap* gene expression levels were comparable in WT and *Fap<sup>KI/KI</sup>* mice (E).

**Fig. S3. FAPgki mice lacked FAP enzyme activity but retained cell surface expression of FAP protein.** (A) FAP specific enzyme assay of plasma from 3-week-old mice showed that *Fap<sup>KI/KI</sup>* (FAPgki) mice lacked FAP enzyme activity whereas *Fap<sup>wt/KI</sup>* mice had approximately half as much FAP enzyme activity as WT mice (n=2 mice per group). (B) Flow cytometry on primary lung fibroblasts from a FAPgki mouse showed that the single point mutation at the enzyme active site serine did not prevent cell surface expression of FAP (30.9% FAP positive cells) in the FAPgki mice. (C) Clockwise flow cytometry gating strategy showed that live and single cells were gated to identify the percentage of FAP positive cells, compared with IgG control. Histogram key: blue is control IgG, red is anti-FAP.

**Fig S4. Improved glucose tolerance in male FAP gko mice.** Oral GTT (A) and glucose AUC (B) at 14 weeks of HFD (Specialty Feeds). Ip GTT (C) and glucose AUC (D) at 20 weeks of HFD (in-house HFD). Individual replicates (B, D). Mean  $\pm$  SEM. n = 6 male mice per group. \*p<0.05 by Mann-Whitney U test.

**Fig. S5. FAPgki mice were protected from pancreatic islet hypertrophy.** FAPgki and WT male mice following 12 weeks of in-house HFD. Representative islets of those quantified for the data presented in Figure 3, immunostained for insulin and glucagon.

**Fig. S6. FAP gko mice were resistant to HFD induced steatosis.** Intrahepatic lipid measured by quantitative calorimetric oil red O assay (fold change from average of WT Chow). Liver was obtained after overnight fasting. \* $p < 0.05$ , with or without exclusion of the highest data point, versus genotype-matched controls using Mann-Whitney U test. Individual replicates and mean  $\pm$  SEM.  $n = 5-6$  female mice per group. Fold changes from livers depicted in Fig. 4 panels E and F were, respectively, 257% and 206%.

**Fig. S7. FAP gko mouse liver.** Sirius Red staining did not detect fibrosis in either WT (A) or FAP gko (B) mice. Representative liver sections from  $n = 5-6$  female mice per group, at 20 weeks of HFD (in-house diet). Scale bars = 200  $\mu\text{m}$ .

**Fig. S8. F4/80 macrophage stain in liver and adipose tissue.** Liver (A), BAT (C), WAT (D) with immunoperoxidase stain of F4/80 and haematoxylin counterstain for nuclei. Quantitation of immunopositivity in liver as a percentage of area in 5 fields at  $\times 200$  magnification from 5 mice per group (B). Scale bars = 100  $\mu\text{m}$ .

**Fig. S9. FAP deficient mice were resistant to HFD induced obesity.** Change in live body weight following the start of diet (A, C) and autopsy body weight at 20 weeks of diet (HFD; Specialty Feeds) in WT and FAP gko mice (B) and 17 weeks of in-house HFD in WT and FAPgki mice (D). Individual replicates (A, C). Mean  $\pm$  SEM.  $n = 10-12$  female (A, B) or 12-14 male (C, D) mice per group. \* $p < 0.05$  versus genotype-matched controls using Mann-Whitney U test.

**Fig. S10. Glucose tolerance AUC was not correlated with body weight or adiposity in FAP deficient mice.** Regression analysis of GTT AUC versus body weight (A) or adiposity (total fat pad weight : body weight; B) of WT and FAP gko mice. Regression analysis of

GTT AUC versus body weight of WT and FAPgki mice (C). These data derive from 20 weeks of in-house HFD. Scatter plots show individual replicates and line of best fit. n=10-12 female (A, B) or 5 male (C) mice.

**Fig. S11. Circulating active GLP-1 and intrahepatic *Ppara* and *Srebp1c* mRNA were unaltered by FAP deficiency in mice.** GLP-1 (7-36) levels in plasma following overnight fasting (basal) and at 15 minutes after a glucose challenge at 20 weeks of diet (A). mRNA expression of *Ppara* (B, D) and *Srebp1c* (C, E) relative to 18S house keeping gene at 20 weeks of HFD. Individual replicate mice. Mean  $\pm$  SEM. n=5-6 female (A), or n=10-12 female (B, C) or male (D, E) mice per group.

**Fig. S12. Intrahepatic mRNA expression of *Dpp4* gene family members was not altered in FAP gko mice compared to WT mice.** Transcripts relative to housekeeper gene 18S RNA. n=10-12 female mice per group, fed either chow (A) or HFD (B) for 20 weeks. Individual replicate mice.

**Fig. S13. *Dpp9* expression and its association with *Dpp4* and *Chrebp* expression.** *Dpp9* mRNA expression was downregulated in HFD mice compared to chow mice (A), and was correlated with *Dpp4* (B) and *Chrebp* mRNA (C), regardless of mouse genotype. Transcripts relative to housekeeper gene 18S. Basal mRNA expression from overnight fasted mice. n=10-12 female mice per group. Scatter plots show individual replicates (A-C). Mean  $\pm$  SEM (A). Line of best fit for each genotype (B, C). \*p<0.05 by Mann-Whitney U test.

**Fig. S14. CD36 immunopositivity in hepatocytes was less in FAPgki than WT liver.** Immunofluorescence of CD36 on mouse liver sections, with immunopositivity from cells having morphological characteristics of hepatocytes and macrophages (A). Quantitation of four fields per section at 200x magnification in arbitrary units of total intensity of fluorescent signal at 488 nm absorbance. Scale bars = 30  $\mu$ m.



**Fig. S15. FAP depletion was not associated with changes in physical activity or energy expenditure.** Physical activity (A) and energy expenditure (B) were measured by indirect calorimetry at 12 weeks of HFD (in-house diet). Mean  $\pm$ SEM, n=6-8 female mice per group. \*p<0.05 versus genotype-matched controls using Mann-Whitney U test.

**Fig S16. Proposed model of effects of FAP deficiency in mice.** Effects of FAP implied from these studies of FAP deficient mice, pathways of FAP action that were identified, and molecules that are potentially involved.

### Supplementary Material References

- [1] Wang XM, Yu DMT, McCaughan GW, Gorrell MD. Fibroblast activation protein increases apoptosis, cell adhesion and migration by the LX-2 human stellate cell line. *Hepatology* 2005;42:935-945.
- [2] Keane FM, Yao T-W, Seelk S, Gall MG, Chowdhury S, Poplawski SE, et al. Quantitation of fibroblast activation protein (FAP)-specific protease activity in mouse, baboon and human fluids and organs. *FEBS Open Bio* 2014;4:43-54.
- [3] Osborne B, Yao T-W, Wang XM, Chen Y, Kotan LD, Nadvi NA, et al. A rare variant in human fibroblast activation protein associated with ER stress, loss of function and loss of cell surface localisation. *Biochim Biophys Acta* 2014;1844:1248-1259.
- [4] Lo L, McLennan SV, Williams PF, Bonner J, Chowdhury S, McCaughan GW, et al. Diabetes is a progression factor for hepatic fibrosis in a high fat fed mouse obesity model of non-alcoholic steatohepatitis. *J Hepatol* 2011;55:435-444.
- [5] Henderson JM, Polak N, Chen J, Roediger B, Weninger W, Kench JG, et al. Multiple liver insults synergize to accelerate experimental hepatocellular carcinoma. *Scientific Reports* 2018;8:10283.

# Supplementary Material

**Fibroblast activation protein enzyme deficiency prevents liver steatosis, insulin resistance and glucose intolerance and increases fibroblast growth factor-21 in diet induced obese mice**

Sumaiya Chowdhury, Sunmi Song, Hui Emma Zhang, Xin Maggie Wang, Margaret G. Gall, Denise Ming Tse Yu, Angelina J. Lay, Michelle Sui Wen Xiang, Kathryn A. Evans, Stefanie Wetzels, Yolanda Liu, Belinda Yau, Andrew L. Coppage, Lisa Lo, Rebecca A. Stokes, Wayne J. Hawthorne, Gregory J. Cooney, Susan V. McLennan, Jenny E. Gunton, William W. Bachovchin, Nigel Turner, Melkam A. Kebede, Geoffrey W. McCaughan, Stephen M. Twigg, Mark D. Gorrell

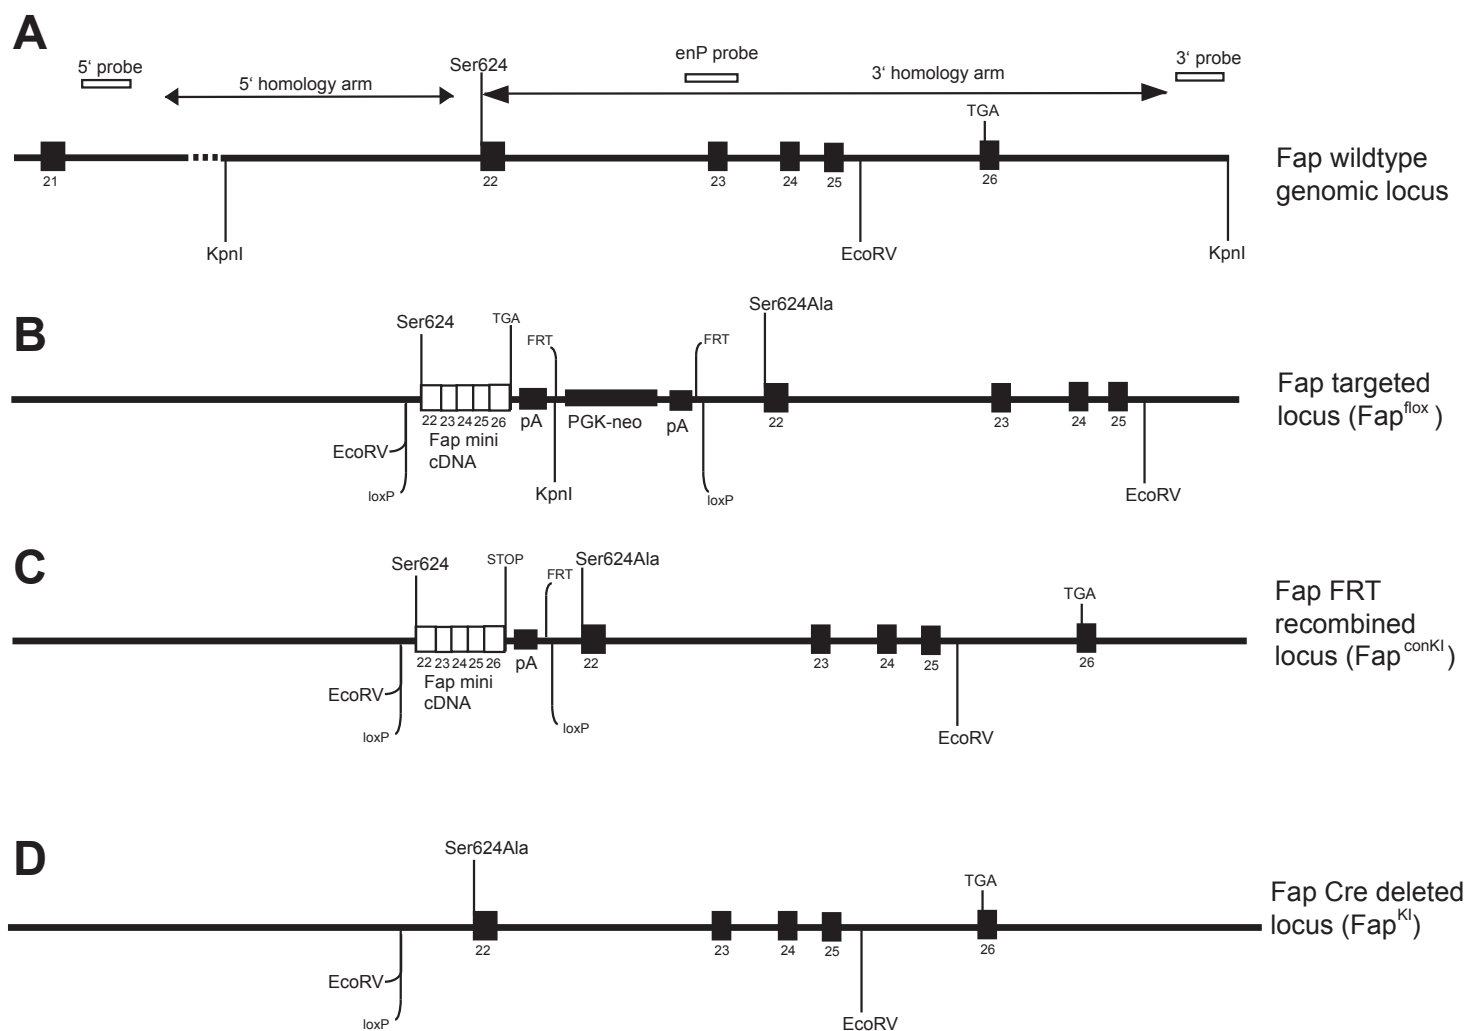

**Fig. S1**

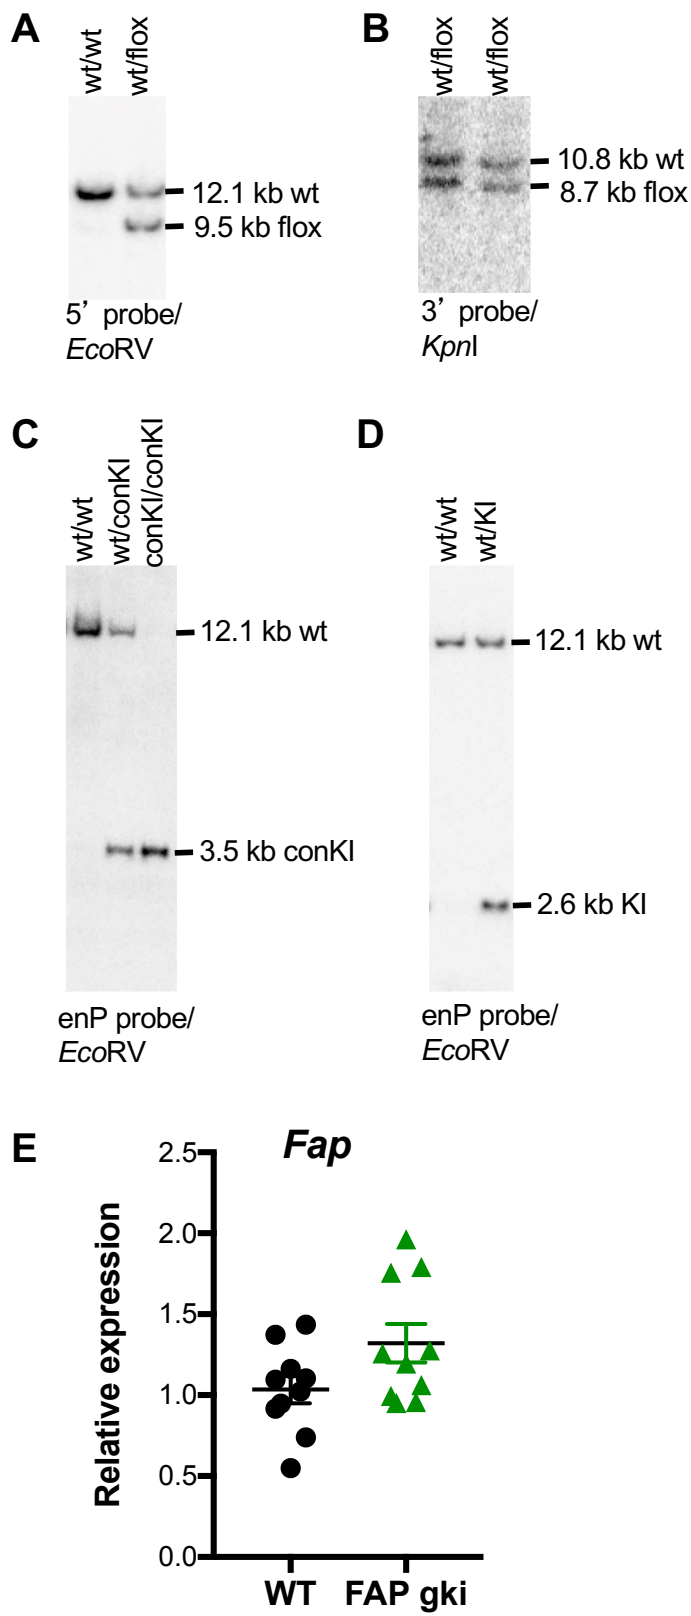

**Fig. S2**

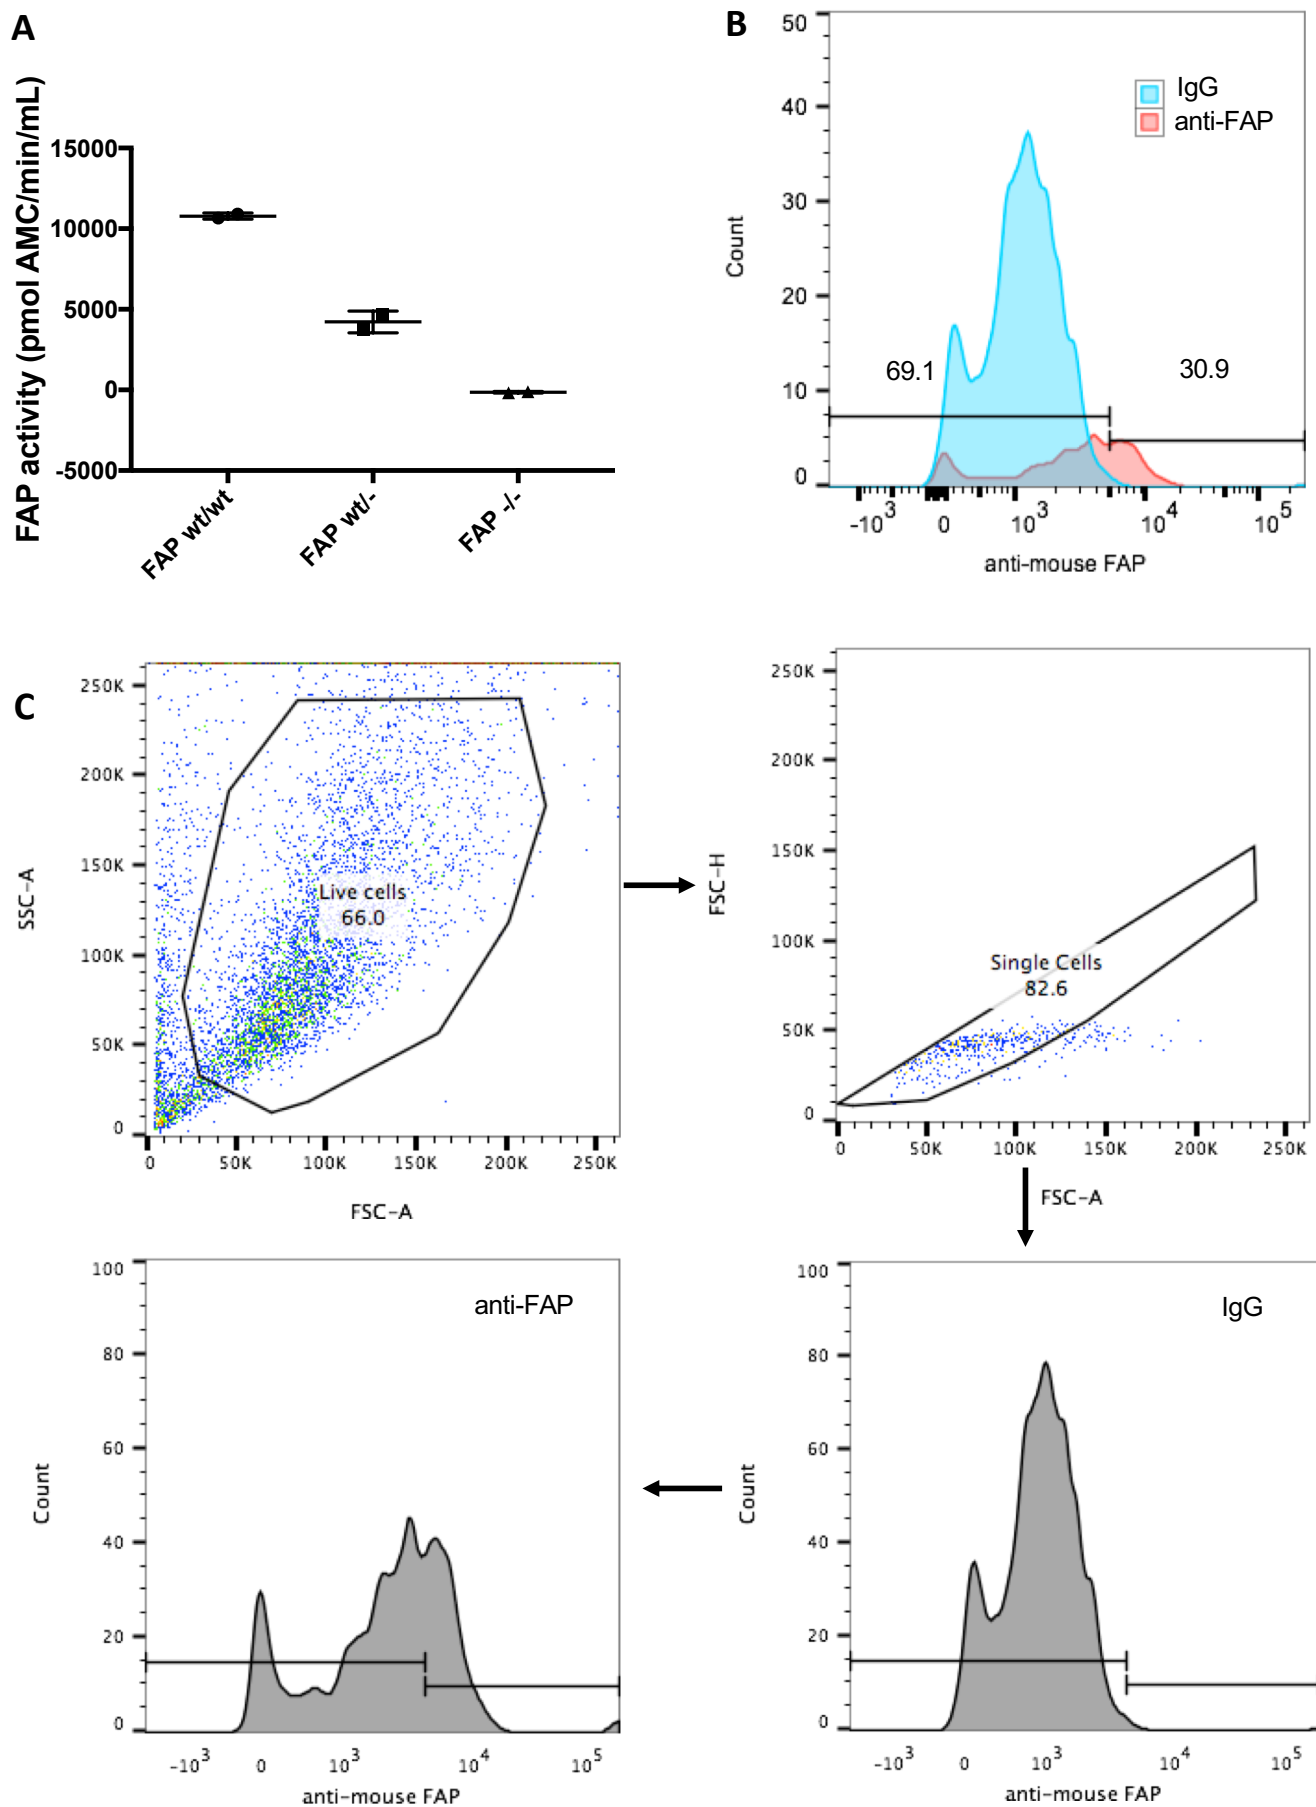

**Fig. S3**

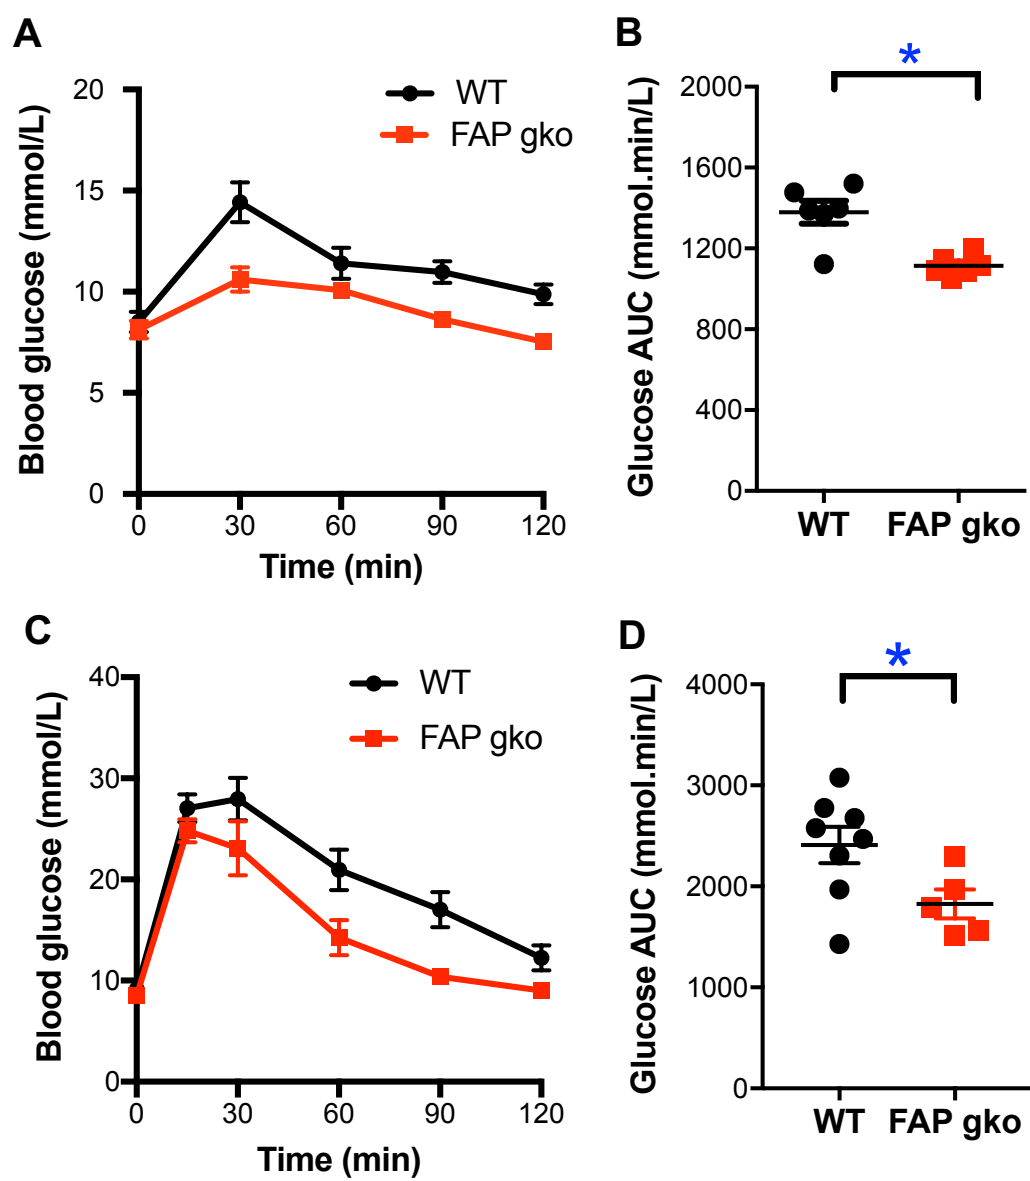

**Fig. S4**

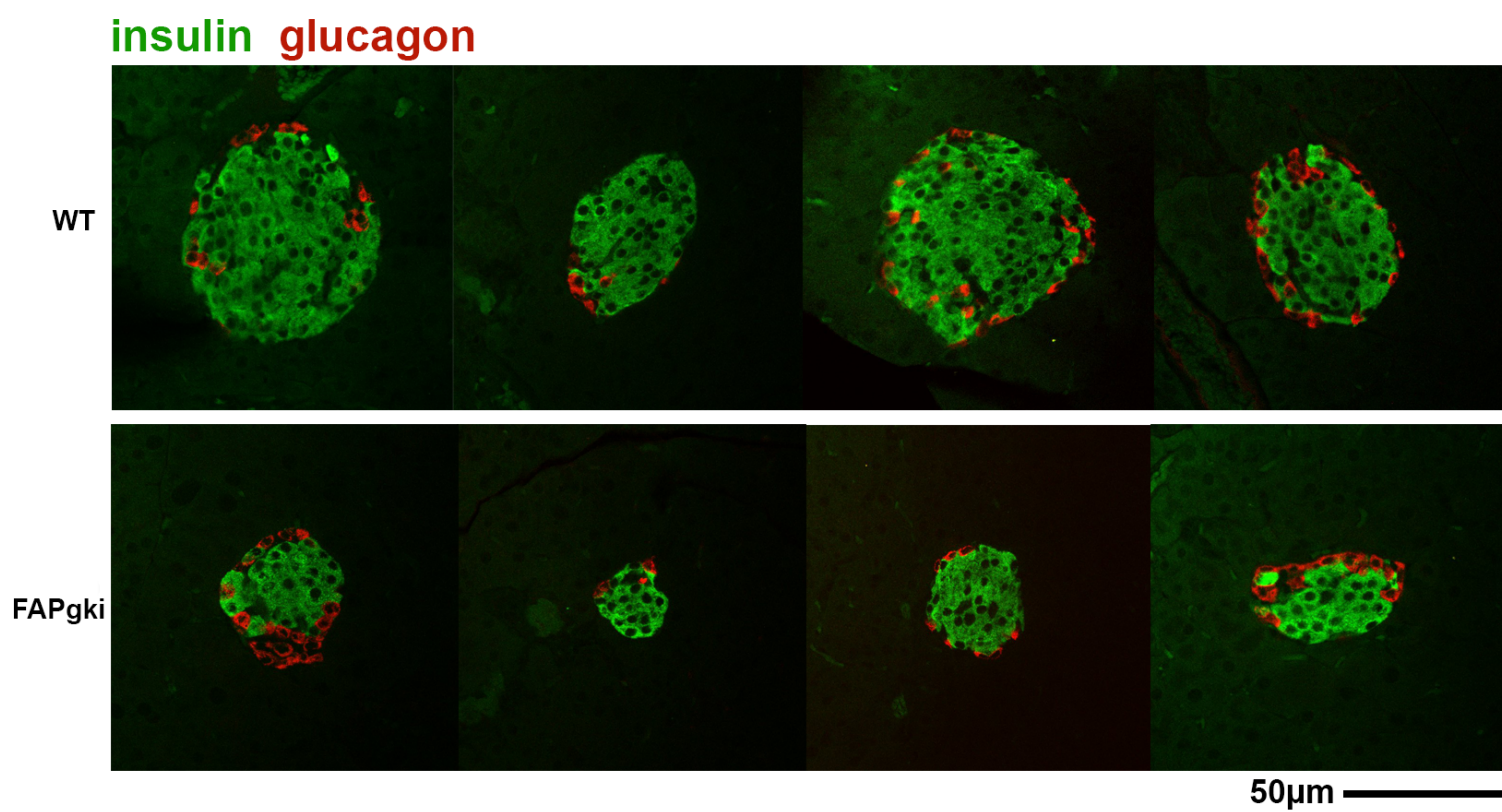

**Fig. S5**



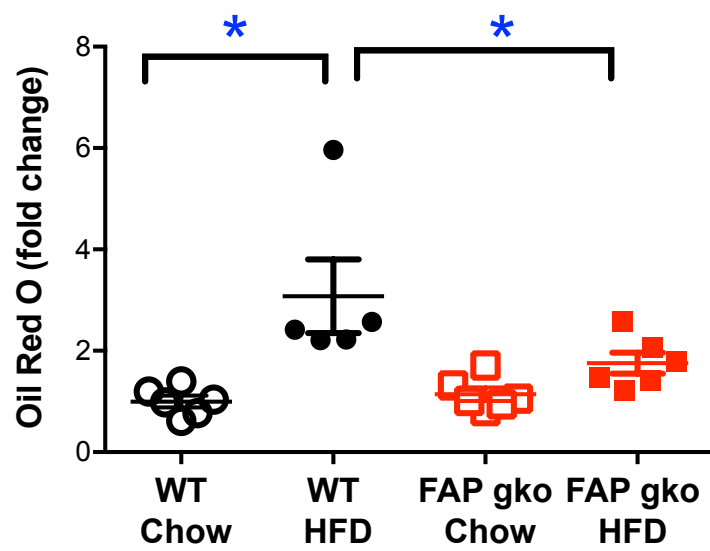

**Fig. S6**

**WT**

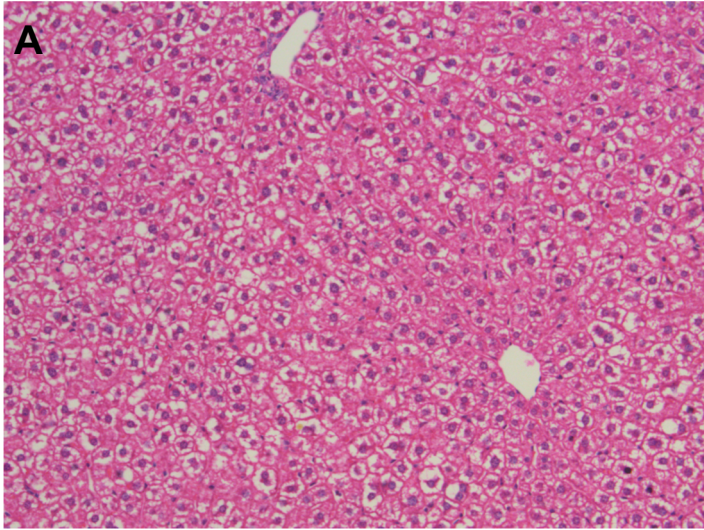

**FAP gko**

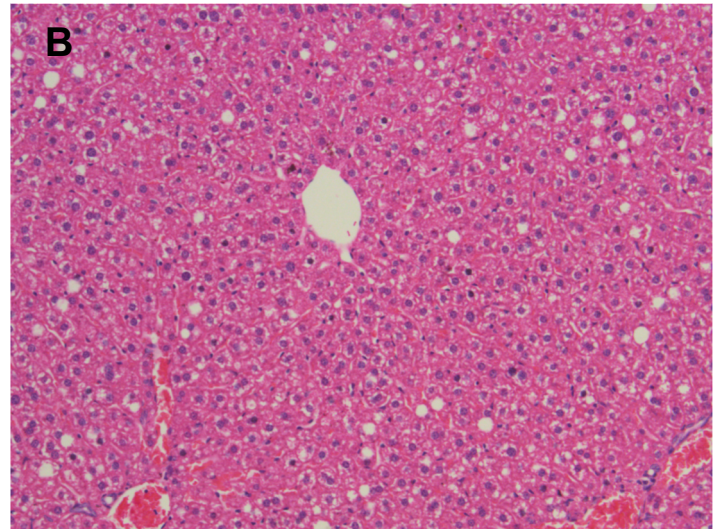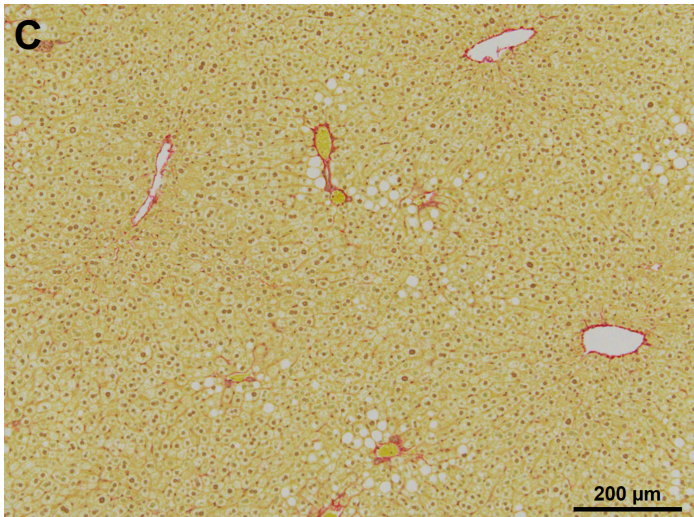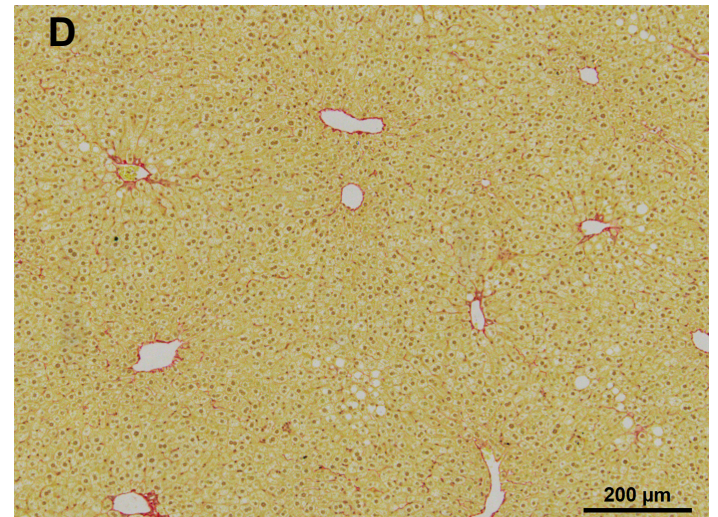

**Fig. S7**



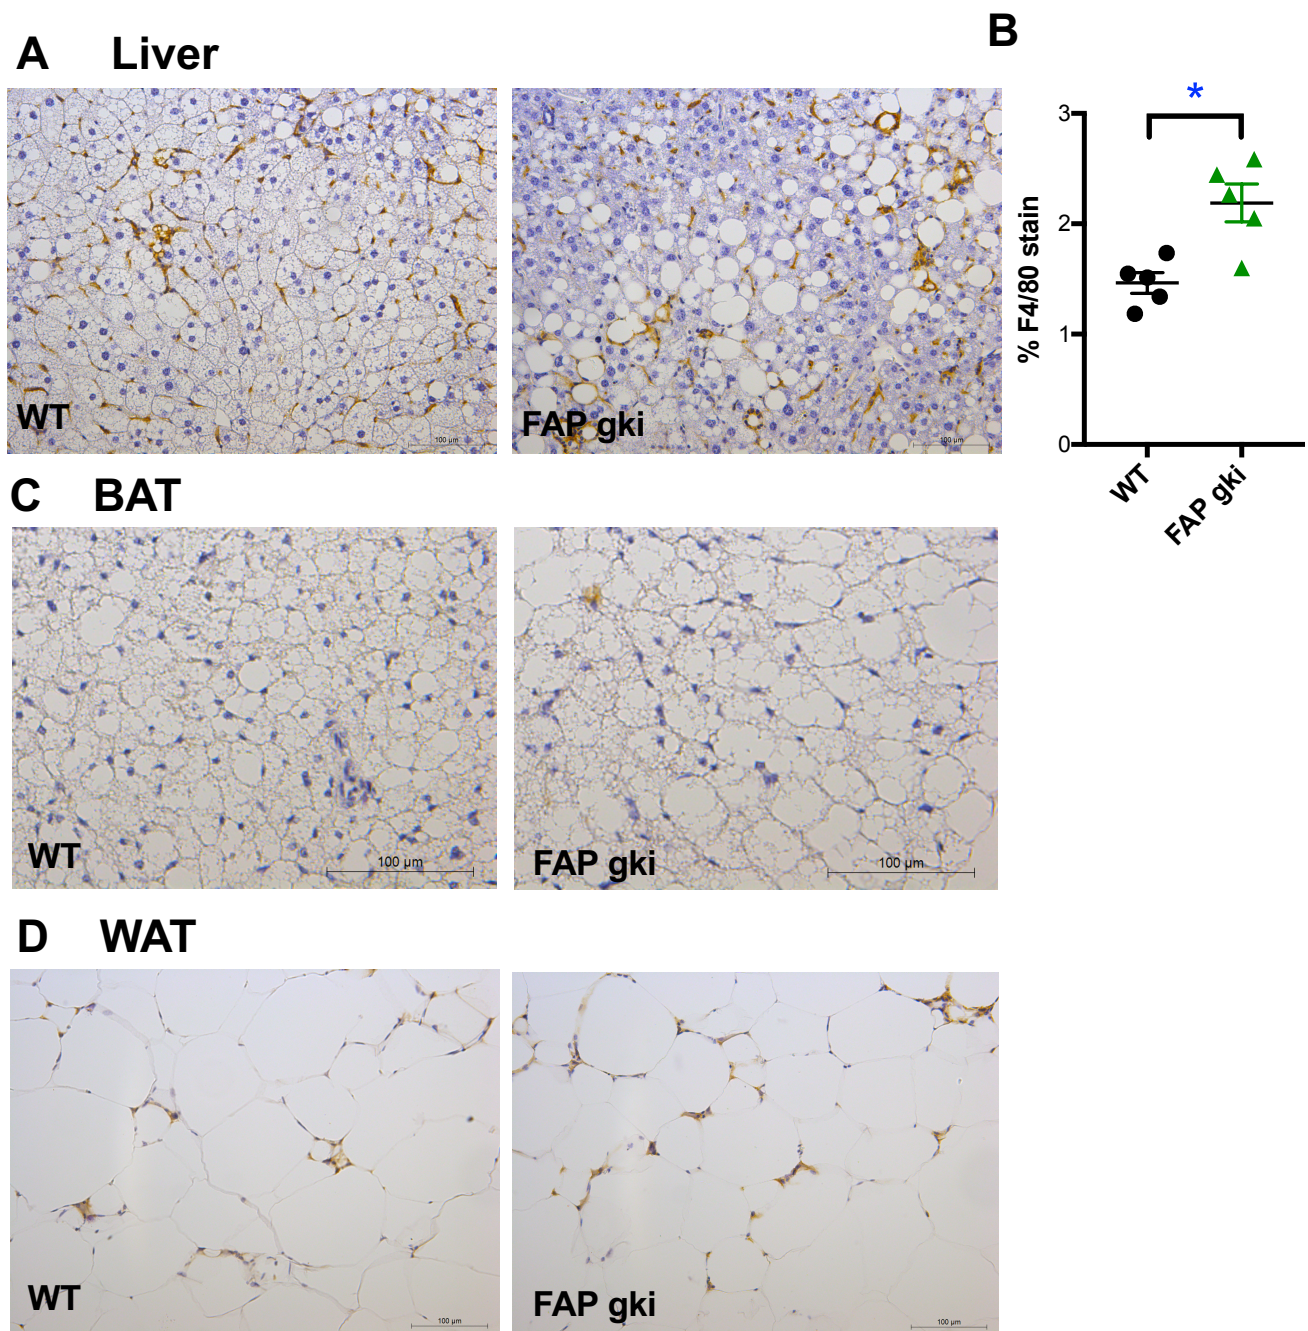

**Fig. S8**

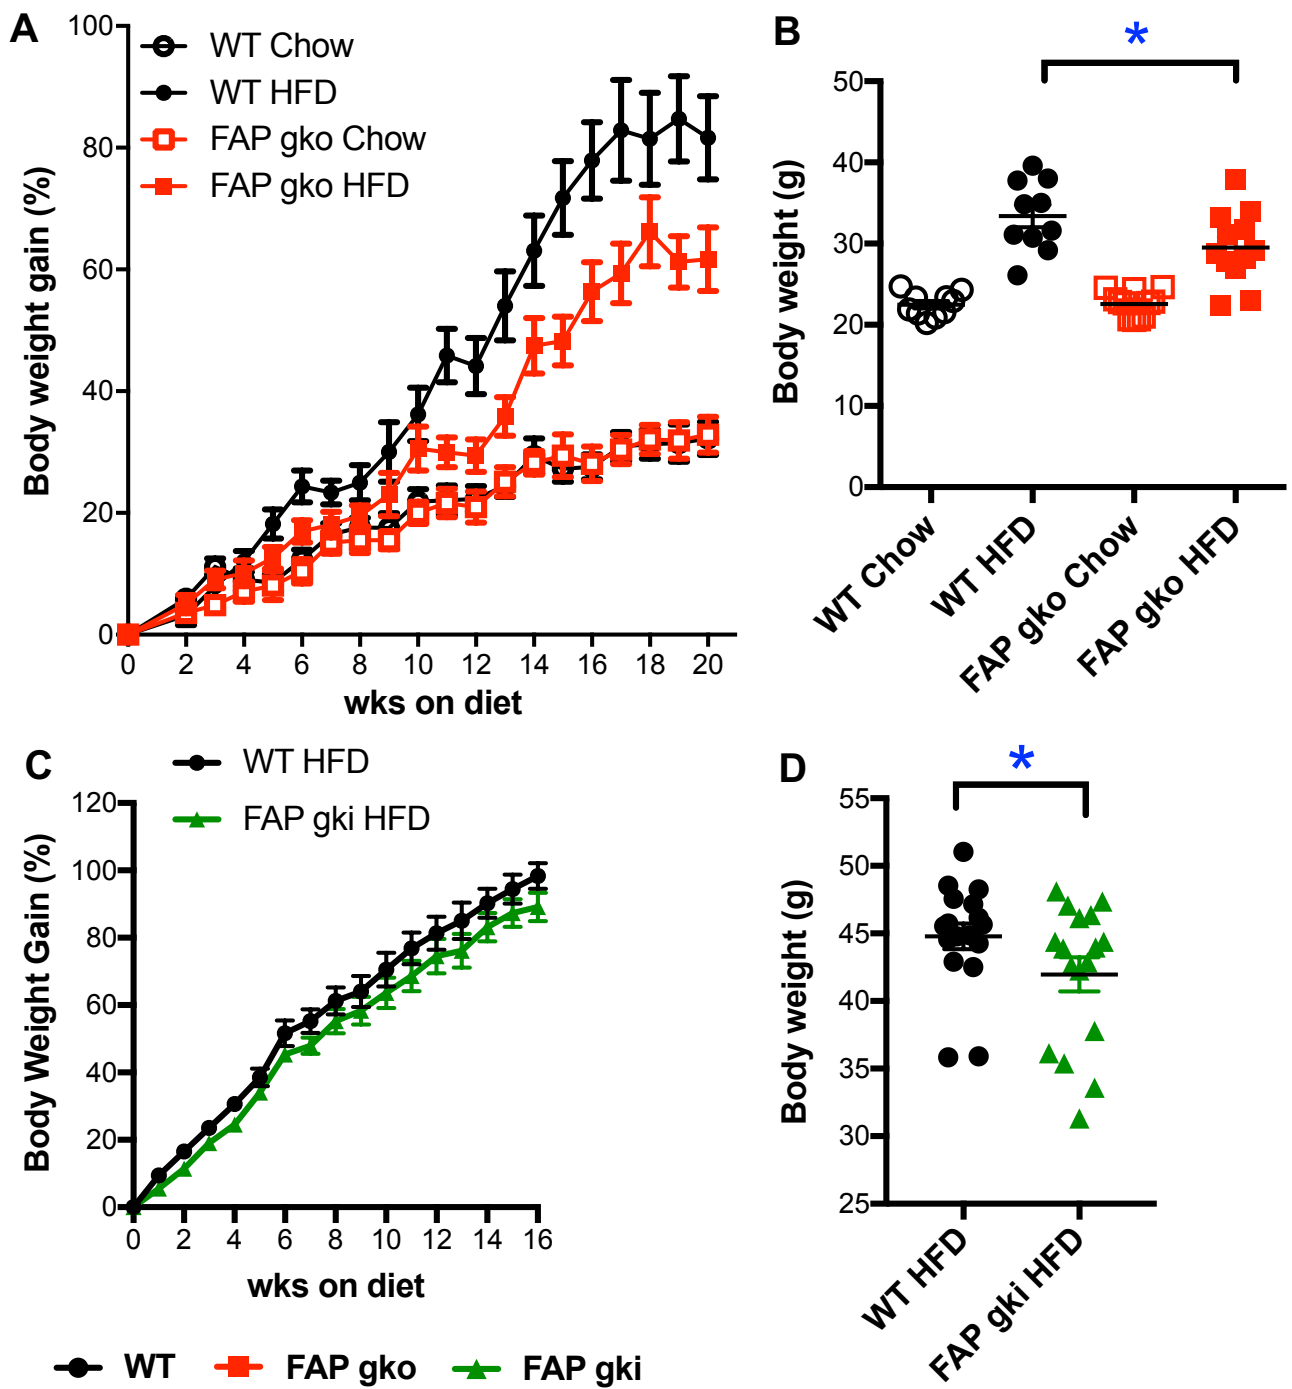

**Fig. S9**

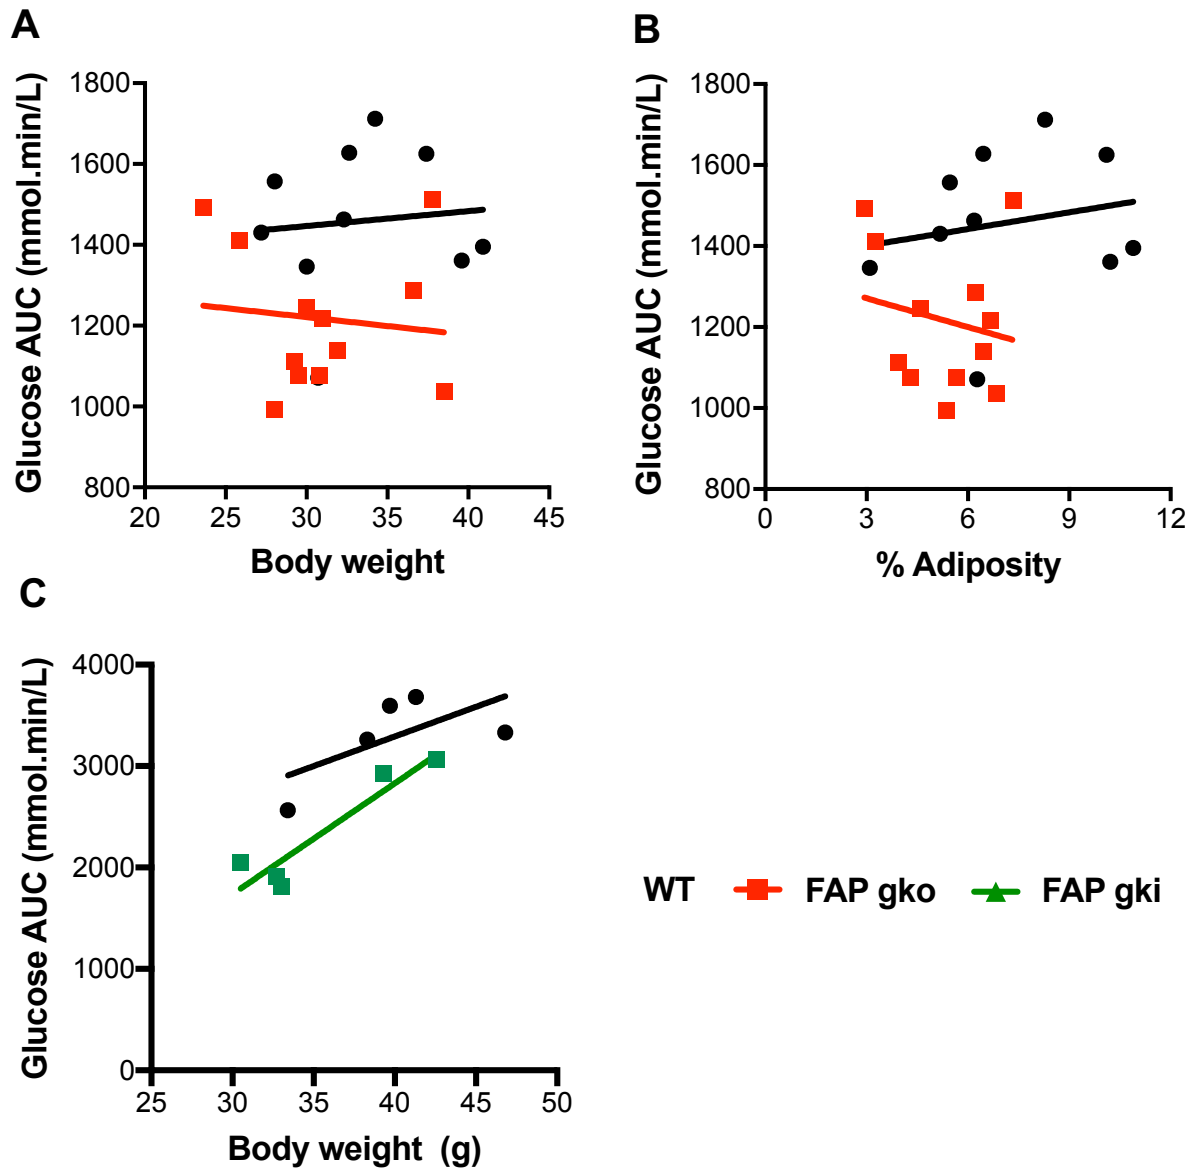

**Fig. S10**

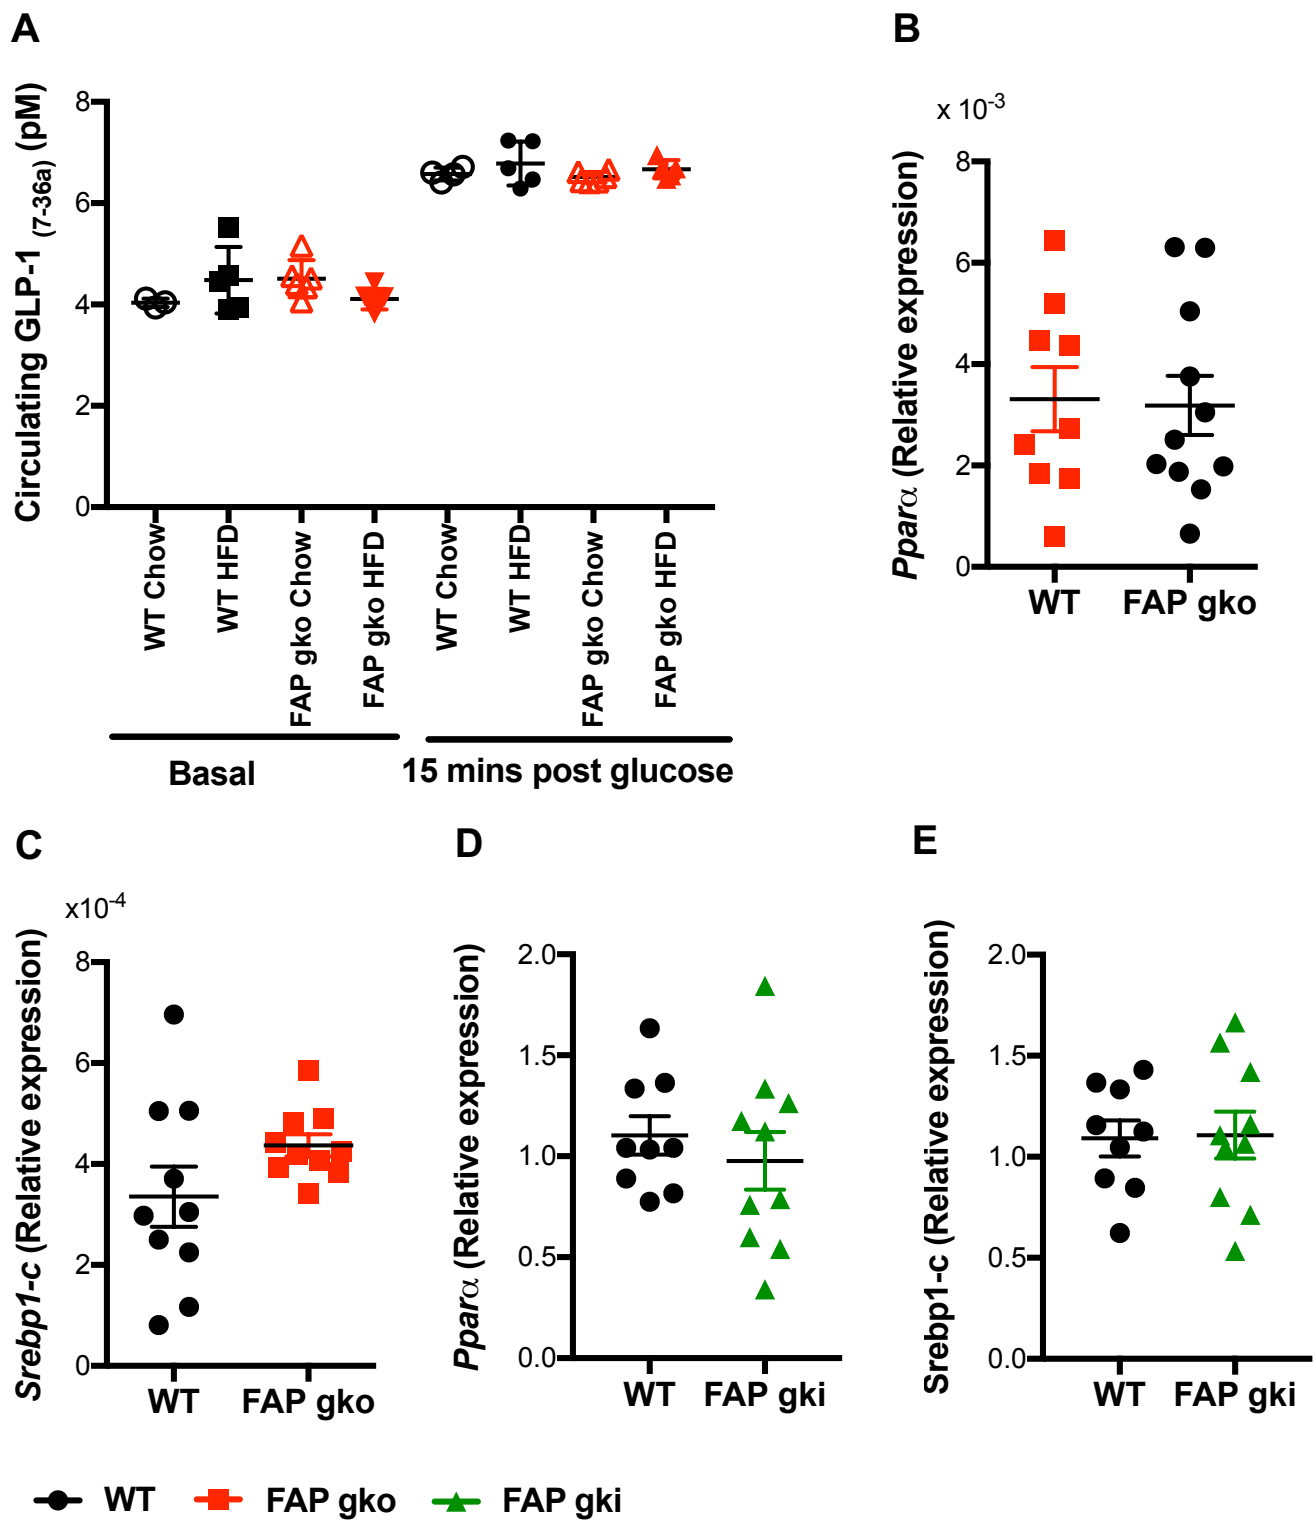

**Fig. S11**

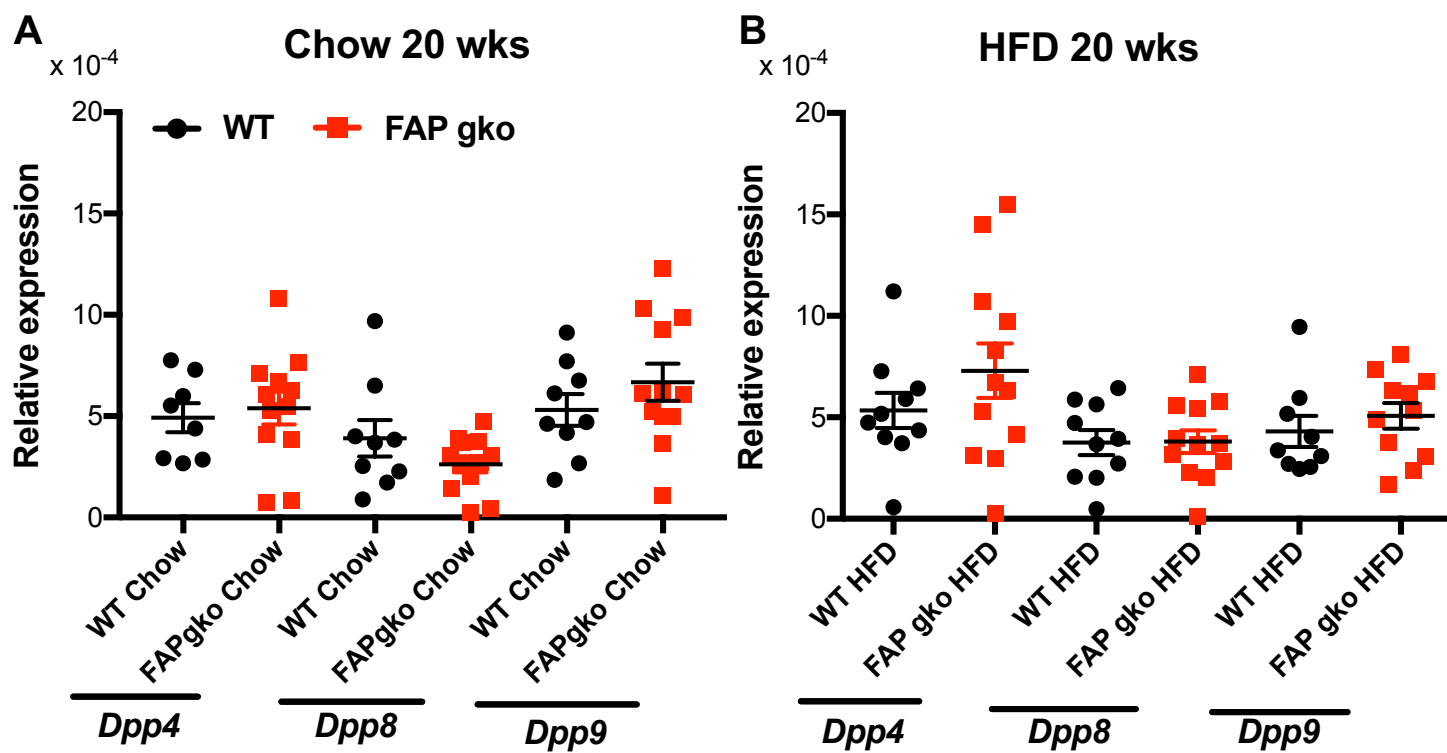

**Fig. S12**



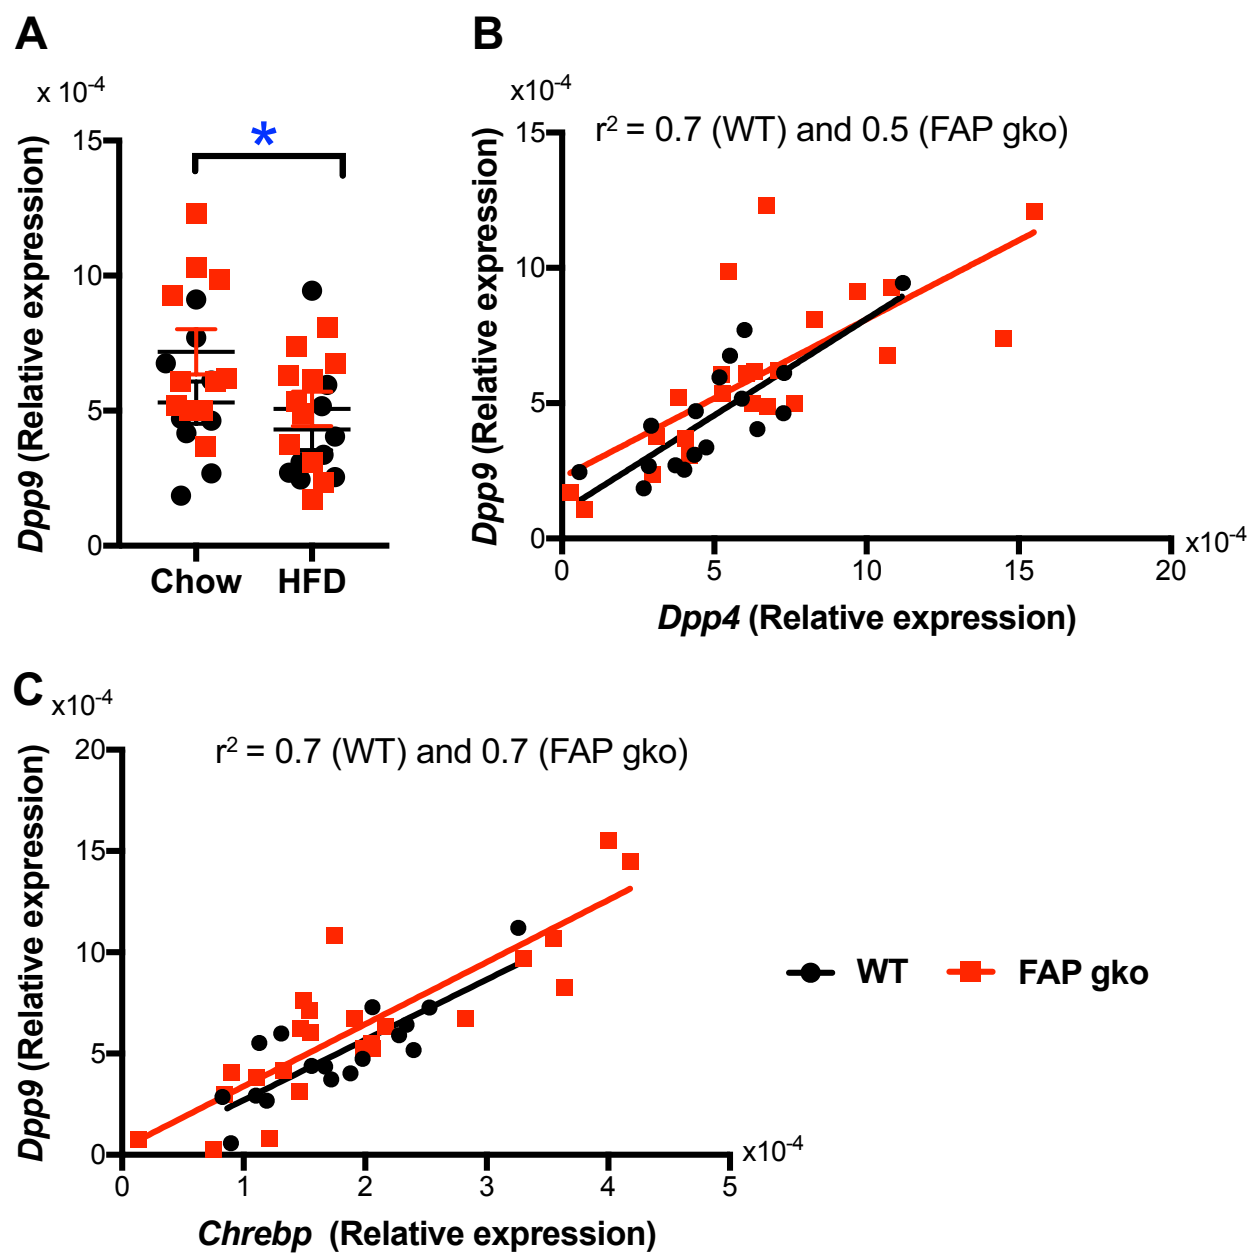

**Fig. S13**

**A**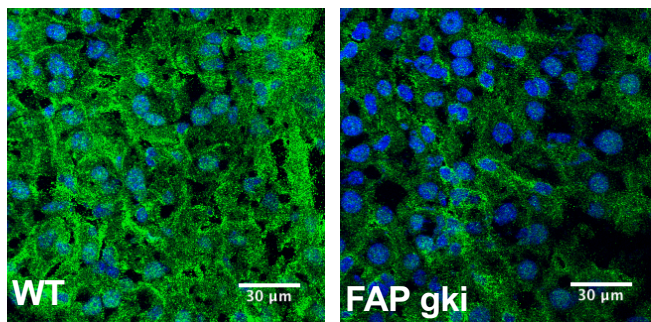**B**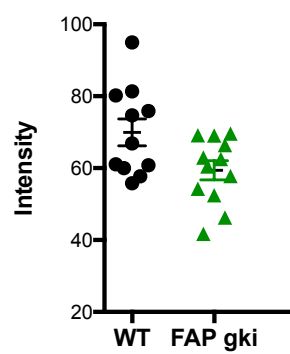

**Fig. S14**

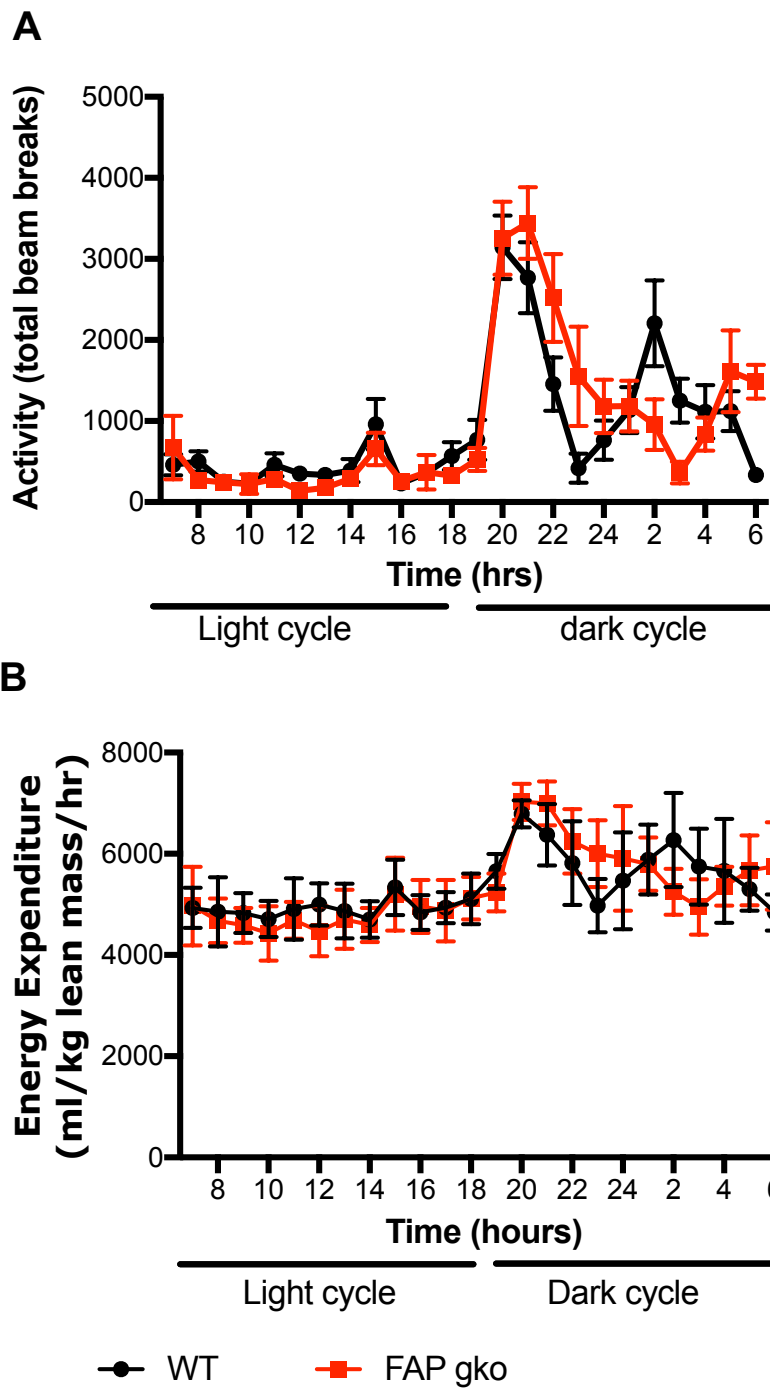

**Fig. S15**

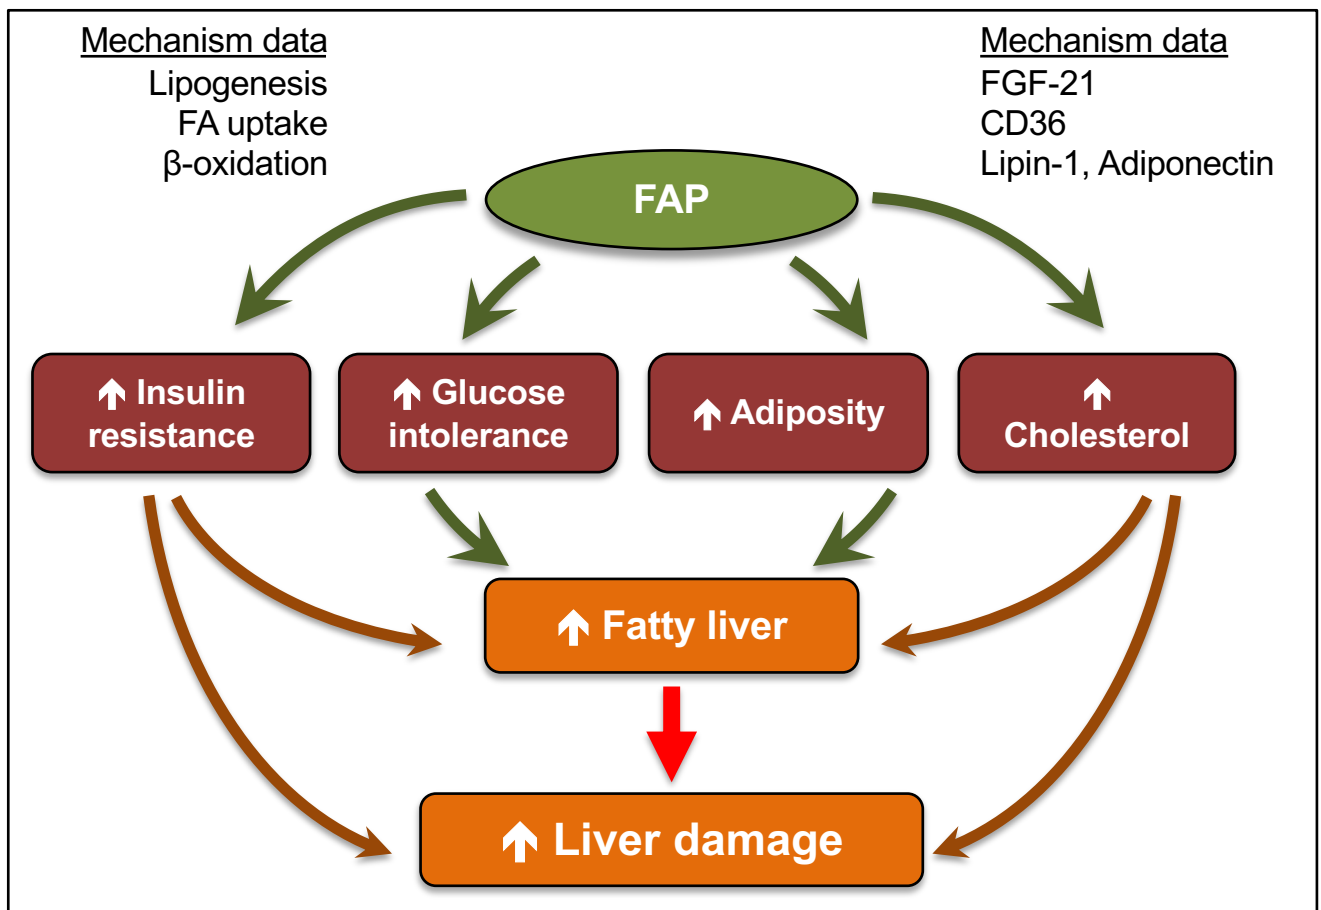

**Fig. S16**
